# Supplementary material for: RNA polymerase mutations that facilitate replication progression in the rep uvrD recF mutant lacking two accessory replicative helicases
Source: PubMed Central journal article supplement (PMC2936116; doi:10.1111/j.1365-2958.2010.07208.x), 2010-07
Supplement: mmi0077-0324-SD1.pdf [file mmi0077-0324-SD1.pdf]

Table S1 Strains and plasmids

| Strain   | Relevant genotype                                                                                                                       | Construction or reference                                                                      |
|----------|-----------------------------------------------------------------------------------------------------------------------------------------|------------------------------------------------------------------------------------------------|
| CAG18499 | <i>zid</i> ::Tn10                                                                                                                       | (Nichols <i>et al.</i> , 1998)                                                                 |
| CAG18500 | <i>thiC</i> ::Tn10                                                                                                                      | (Nichols <i>et al.</i> , 1998)                                                                 |
| JJC40    | wild-type                                                                                                                               | Laboratory collection                                                                          |
| JJC147   | Hfr PK3-PO131 <i>argE86</i> ::Tn10                                                                                                      | CGSC6763 Genetic Stock Center                                                                  |
| JJC212   | <i>uvrD</i> ::Tn5                                                                                                                       | Laboratory collection                                                                          |
| JJC451   | <i>recF400</i> ::Tn5                                                                                                                    | Laboratory collection                                                                          |
| JJC754   | $\Delta$ <i>ruvABC</i> :: <i>cm</i>                                                                                                     | (Seigneur <i>et al.</i> , 1998)                                                                |
| JJC760   | $\Delta$ <i>rep</i> :: <i>cam</i> [pGBts-rep+]                                                                                          | (Petit and Ehrlich, 2002)                                                                      |
| JJC213   | $\Delta$ <i>rep</i> :: <i>kan</i>                                                                                                       | (Uzest <i>et al.</i> , 1991)                                                                   |
| JJC1086  | $\Delta$ <i>recB</i> :: <i>kan</i> [pDWS2]                                                                                              | $\Delta$ <i>recB</i> :: <i>kan</i> (Murphy, 1998) pDWS2: pBR322-RecBCD <sup>+</sup> (G. Smith) |
| JJC1177  | <i>rep</i> :: <i>Ap</i>                                                                                                                 | Laboratory collection                                                                          |
| JJC1519  | Hfr PK3-PO131 <i>argE86</i> ::Tn10 <i>recF400</i> ::Tn5                                                                                 | JJC147 * P1 JJC450                                                                             |
| JJC1706  | $\Delta$ <i>rep</i> :: <i>cam</i> <i>uvrD</i> ::Tn5 <i>recO</i> ::Tn5 <i>metE</i> ::Tn10 [pGBts-rep+]                                   | MAC569 in (Petit and Ehrlich, 2002)                                                            |
| JJC1707  | $\Delta$ <i>rep</i> :: <i>cam</i> <i>uvrD</i> ::Tn5 <i>recR</i> ::Tn5 <i>metE</i> ::Tn10 [pGBts-rep+]                                   | MAC 574 in (Petit and Ehrlich, 2002)                                                           |
| JJC1708  | $\Delta$ <i>rep</i> :: <i>cam</i> <i>uvrD</i> ::Tn5 [pGBts-rep+]                                                                        | MAC 556 in (Petit and Ehrlich, 2002)                                                           |
| JJC1857  | $\Delta$ <i>dinG</i> :: <i>kan</i>                                                                                                      | Gene replacement of <i>dinG</i> by Kan <sup>R</sup> of pKD4 (Datsenko and Wanner, 2000)        |
| JJC1861  | $\Delta$ <i>dinG</i> :: <i>cm</i>                                                                                                       | (Boubakri <i>et al.</i> , 2010)                                                                |
| JJC1892  | <i>rep</i> :: <i>Ap</i> [pAM-rep+]                                                                                                      | Laboratory collection                                                                          |
| JJC1945  | <i>sfIA11</i>                                                                                                                           | (Grompone <i>et al.</i> , 2004)                                                                |
| JJC1960  | <i>uvrD</i> ::Tn5 <i>rep</i> :: <i>Ap</i> [pAM-rep+]                                                                                    | Laboratory collection                                                                          |
| JJC2062  | <i>recF400</i> ::Tn5 <i>zid501</i> ::Tn10                                                                                               | Laboratory collection                                                                          |
| JJC2177  | Hfr PK3-PO131 <i>recF400</i> ::Tn5                                                                                                      | JJC1519* P1 JJC40                                                                              |
| JJC2230  | $\Delta$ <i>ruvABC</i> :: <i>cm</i> [pGB-ruvABC+]                                                                                       | (Lestini and Michel, 2008)                                                                     |
| JJC2386  | $\Delta$ ( <i>uvrD-yigB</i> ):: <i>cam</i>                                                                                              | (Flores <i>et al.</i> , 2005)                                                                  |
| JJC2418  | <i>rep</i> :: <i>Ap</i> <i>uvrD</i> ::Tn5 [pGBts-rep+]                                                                                  | JJC1708 P1 JJC1177                                                                             |
| JJC2451  | <i>rep</i> :: <i>Ap</i> <i>uvrD</i> ::Tn5 <i>recF400</i> ::Tn5 [pGBts-rep+]                                                             | JJC2418 * PA JJC451                                                                            |
| JJC2488  | <i>sfIA11</i> <i>rep</i> :: <i>Ap</i> $\Delta$ ( <i>uvrD-yigB</i> ):: <i>cam</i> <i>recO</i> ::Tn5 [pGBts-rep+]                         | Laboratory collection                                                                          |
| JJC2634  | $\Delta$ <i>uvrD294</i> :: <i>Kan</i>                                                                                                   | (Lestini and Michel, 2007)                                                                     |
| JJC3122  | $\Delta$ <i>rep</i> :: <i>cam</i> <i>uvrD</i> ::Tn5 <i>recQ1803</i> ::Tn3 [pGBts-rep+]                                                  | (Lestini and Michel, 2008)                                                                     |
| JJC3870  | $\Delta$ <i>rep</i> :: <i>kan</i> [pAM-rep+]                                                                                            | JJC213 transformed with [pAM-rep+]                                                             |
| JJC3971  | $\Delta$ <i>rep</i> :: <i>kan</i> $\Delta$ <i>uvrD294</i> :: <i>kan</i> [pAM-rep+]                                                      | JJC3870 * P1 JJC2634                                                                           |
| JJC3998  | Hfr PK3-PO131 <i>recF400</i> ::Tn5 <i>rep</i> :: <i>Ap</i>                                                                              | JJC2177 * P1 JJC1177                                                                           |
| JJC4013  | Hfr PK3-PO131 <i>recF400</i> ::Tn5 <i>rep</i> :: <i>Ap</i> [pAM-rep]                                                                    | JJC3998 transformed with pAM-rep                                                               |
| JJC4035  | Hfr PK3-PO131 <i>recF400</i> ::Tn5 <i>rep</i> :: <i>Ap</i> $\Delta$ ( <i>uvrD-yigB</i> ):: <i>cam</i> [pAM-rep]                         | JJC4013 * P1 JJC2386                                                                           |
| JJC4038  | <i>rep</i> :: <i>Ap</i> <i>uvrD</i> ::Tn5 <i>recF400</i> ::Tn5 <i>rpoC</i> <sup>P451L</sup> (S1)                                        | LB- resistant derivative of JJC4048                                                            |
| JJC4039  | <i>rep</i> :: <i>Ap</i> <i>uvrD</i> ::Tn5 <i>recF400</i> ::Tn5 <i>rpoC</i> <sup>H113R</sup> (S2)                                        | LB- resistant derivative of JJC4048                                                            |
| JJC4040  | <i>rep</i> :: <i>Ap</i> <i>uvrD</i> ::Tn5 <i>recF400</i> ::Tn5 <i>rpoB</i> <sup>H447R</sup> (S3m)                                       | LB- resistant derivative of JJC4048                                                            |
| JJC4041  | <i>rep</i> :: <i>Ap</i> <i>uvrD</i> ::Tn5 <i>recF400</i> ::Tn5 <i>rpoB</i> <sup>D444G</sup> (S3a)                                       | LB- resistant derivative of JJC4048                                                            |
| JJC4043  | <i>rep</i> :: <i>Ap</i> <i>uvrD</i> ::Tn5 <i>recF400</i> ::Tn5 <i>rpoC</i> <sup>H113R</sup> [pAM-rep] $\Delta$ <i>dinG</i> :: <i>cm</i> | JJC4039 * pAM-rep * P1 JJC1861                                                                 |
| JJC4044  | <i>rep</i> :: <i>Ap</i> <i>uvrD</i> ::Tn5 <i>recF400</i> ::Tn5 <i>rpoB</i> <sup>H447R</sup> [pAM-rep] $\Delta$ <i>dinG</i> :: <i>cm</i> | JJC4040 * pAM-rep * P1 JJC1861                                                                 |

|         |                                                                                         |                                                                                                   |
|---------|-----------------------------------------------------------------------------------------|---------------------------------------------------------------------------------------------------|
| JJC4045 | <i>rep::Ap uvrD::Tn5 recF400::Tn5 rpoB<sup>D444G</sup> [pAM-rep] ΔdinG::cm</i>          | JJC4041 * pAM-rep * P1 JJC1861                                                                    |
| JJC4047 | <i>rep::Ap uvrD::Tn5 recF400::Tn5 rpoC<sup>P451L</sup> [pAM-rep] ΔdinG::cm</i>          | JJC4038 * pAM-rep * P1 JJC1861                                                                    |
| JJC4048 | <i>rep::Ap uvrD::Tn5 recF400::Tn5</i>                                                   | JJC2451 cured of pBGts-rep                                                                        |
| JJC4053 | <i>rep::Ap uvrD::Tn5 recF400::Tn5 rpoC<sup>H113R</sup> (S3b)</i>                        | LB- resistant derivative of JJC4048                                                               |
| JJC4100 | Hfr PK3-PO131 <i>recF400::Tn5 rep::Ap Δ(uvrD-yigB)::cam rpoB<sup>N518D</sup></i>        | Fast growing segregant of JJC4035                                                                 |
| JJC4107 | <i>relA::kan</i>                                                                        | RLG3373 (Dr. R. Gourse)                                                                           |
| JJC4108 | <i>relA::kan spoT::cam</i>                                                              | RLG3373 (Dr. R. Gourse)                                                                           |
| JJC4109 | <i>rpoC<sup>Δ215-220</sup> thiC::Tn10</i>                                               | RLG3381 in (Bartlett <i>et al.</i> , 1998)                                                        |
| JJC4112 | <i>lacZ lacI lambda::P1<sub>-61+1</sub> rrmB lacZ</i>                                   | RLG5950 in (Bartlett <i>et al.</i> , 1998)                                                        |
| JJC4113 | <i>lacZ lacI lambda::P1<sub>-61+1</sub> rrmB lacZ greA::cam</i>                         | RLG7239 (Dr. R. Gourse)                                                                           |
| JJC4114 | <i>lacZ lacI lambda::P1<sub>-61+1</sub> rrmB lacZ greB::kan</i>                         | RLG7240 (Dr. R. Gourse)                                                                           |
| JJC4124 | <i>rep::Ap Δ(uvrD-yigB)::cam recF400::Tn5 rpoC<sup>P451L</sup></i>                      | JJC4038 * Hfr4100 selection for Cm <sup>R</sup> Tet <sup>R</sup> , screening for Rif <sup>S</sup> |
| JJC4125 | <i>rep::Ap Δ(uvrD-yigB)::cam recF400::Tn5 rpoB<sup>H447R</sup></i>                      | JJC4040 * Hfr4100 selection for Cm <sup>R</sup> Tet <sup>R</sup> , screening for Rif <sup>S</sup> |
| JJC4126 | <i>rep::Ap Δ(uvrD-yigB)::cam recF400::Tn5 rpoB<sup>D444G</sup></i>                      | JJC4041 * Hfr4100 selection for Cm <sup>R</sup> Tet <sup>R</sup> , screening for Rif <sup>S</sup> |
| JJC4141 | <i>rep::Ap Δ(uvrD-yigB)::cam recF400::Tn5 rpoC<sup>H113R</sup></i>                      | JJC4039 * Hfr4100 selection for Cm <sup>R</sup> Tet <sup>R</sup> , screening for Rif <sup>S</sup> |
| JJC4142 | <i>rep::Ap Δ(uvrD-yigB)::cam recF400::Tn5 rpoC<sup>H113R</sup></i>                      | JJC4053 * Hfr4100 selection for Cm <sup>R</sup> Tet <sup>R</sup> , screening for Rif <sup>S</sup> |
| JJC4162 | <i>rep::Ap Δ(uvrD-yigB)::cam recF400::Tn5 rpoC<sup>P451L</sup> thiC::Tn10</i>           | JJC4124 * P1 CGA18500                                                                             |
| JJC4163 | <i>rep::Ap Δ(uvrD-yigB)::cam recF400::Tn5 rpoB<sup>H447R</sup> thiC::Tn10</i>           | JJC4125 * P1 CAG18500                                                                             |
| JJC4164 | <i>rep::Ap Δ(uvrD-yigB)::cam recF400::Tn5 rpoB<sup>D444G</sup> thiC::Tn10</i>           | JJC4126 * P1 CAG18500                                                                             |
| JJC4170 | <i>rep::Ap Δ(uvrD-yigB)::cam recF400::Tn5 rpoC<sup>H113R</sup> thiC::Tn10</i>           | JJC4141 * P1 CAG18500                                                                             |
| JJC4174 | <i>sfiA11 ΔrecQ6215::Cm</i>                                                             | (Lestini and Michel, 2007)                                                                        |
| JJC4186 | <i>recF400::Tn5 rep::Ap Δ(uvrD-yigB)::cam rpoB<sup>N518D</sup></i>                      | JJC4048 * Hfr4100 selection for Cm <sup>R</sup> Tet <sup>R</sup> , screening for Rif <sup>R</sup> |
| JJC4200 | <i>recF400::Tn5 rep::Ap Δ(uvrD-yigB)::cam rpoB<sup>N518D</sup> thiC::Tn10</i>           | JJC4186 * P1 CAG18500                                                                             |
| JJC4215 | <i>Δrep::kan ΔuvrD294::kan [pAM-rep+] rpoC<sup>Δ215-220</sup> thiC::Tn10</i>            | JJC3971 * JJC4109                                                                                 |
| JJC4247 | <i>rep::Ap Δ(uvrD-yigB)::cam zid::Tn10 rpoC<sup>P451L</sup> [pAM-rep]</i>               | JJC4124 * P1 CAG18999                                                                             |
| JJC4248 | <i>rep::Ap Δ(uvrD-yigB)::cam zid::Tn10 rpoB<sup>H447R</sup> [pAM-rep]</i>               | JJC4125* P1 CAG18999                                                                              |
| JJC4249 | <i>rep::Ap Δ(uvrD-yigB)::cam zid::Tn10 rpoB<sup>D444G</sup> [pAM-rep]</i>               | JJC4126*P1 CAG18999                                                                               |
| JJC4251 | <i>rep::Ap Δ(uvrD-yigB)::cam zid::Tn10 rpoC<sup>H113R</sup> [pAM-rep]</i>               | JJC4442 * P1 CAG18999                                                                             |
| JJC4252 | Hfr PK3-PO131 <i>zid::Tn10 rep::Ap Δ(uvrD-yigB)::cam rpoB<sup>N518D</sup> [pAM-rep]</i> | JJC4100 * P1 CAG18999                                                                             |
| JJC4257 | <i>sfiA11 rep::Ap Δ(uvrD-yigB)::cam recO::Tn5 rpoB<sup>N518D</sup> thiC::Tn10</i>       | JJC2488 * P1 JJC4200 cured of pGBts-rep                                                           |
| JJC4281 | <i>Δrep::kan ΔuvrD294::kan [pAM-rep+] rpoB<sup>H447R</sup> thiC::Tn10</i>               | JJC3971 * P1 JJC4163                                                                              |
| JJC4283 | <i>sfiA11 rep::Ap Δ(uvrD-yigB)::cam recO::Tn5 rpoC<sup>P451L</sup> thiC::Tn10</i>       | JJC2488 * P1 JJC4162 cured of pGBts-rep                                                           |
| JJC4304 | <i>Δrep::kan ΔuvrD294::kan [pAM-rep+] rpoB<sup>D444G</sup> thiC::Tn10</i>               | JJC3971 * P1 JJC4164                                                                              |
| JJC4324 | <i>sfiA11 rep::Ap Δ(uvrD-yigB)::cam recO::Tn5 rpoB<sup>D444G</sup> thiC::Tn10</i>       | JJC2488 * P1 JJC4164 cured of pGBts-rep                                                           |
| JJC4340 | <i>rep::Ap Δ(uvrD-yigB)::cam recF400::Tn5 rpoC<sup>H113R</sup> thiC::Tn10</i>           | JJC4142 * P1 CAG18500                                                                             |
| JJC4342 | <i>sfiA11 rep::Ap Δ(uvrD-yigB)::cam recO::Tn5 rpoB<sup>H447R</sup> thiC::Tn10</i>       | JJC2488 * P1 JJC4163 cured of pGBts-rep                                                           |
| JJC4344 | <i>sfiA11 rep::Ap Δ(uvrD-yigB)::cam recO::Tn5 rpoC<sup>H113R</sup> thiC::Tn10</i>       | JJC2488 * P1 JJC4170 cured of pGBts-rep                                                           |
| JJC4354 | <i>Δrep::kan ΔuvrD294::kan [pAM-rep+] rpoC<sup>P451L</sup> thiC::Tn10</i>               | JJC3971 * P1 JJC4162                                                                              |

|         |                                                                                                      |                                  |
|---------|------------------------------------------------------------------------------------------------------|----------------------------------|
| JJC4355 | $\Delta rep::kan \Delta uvrD294::kan$ [pAM-rep+] <i>rpoC</i> <sup>H113R</sup> <i>thiC::Tn10</i>      | JJC3971 * P1 JJC4170             |
| JJC4488 | <i>rpoB</i> <sup>N518D</sup> <i>thiC::Tn10</i>                                                       | JJC40 * P1 JJC4200               |
| JJC4489 | <i>rpoC</i> <sup>P451L</sup> <i>thiC::Tn10</i>                                                       | JJC40 * P1 JJC4162               |
| JJC4490 | <i>rpoB</i> <sup>D444G</sup> <i>thiC::Tn10</i>                                                       | JJC40 * P1 JJC4164               |
| JJC4491 | <i>rpoB</i> <sup>H447R</sup> <i>thiC::Tn10</i>                                                       | JJC40 * P1 JJC4163               |
| JJC4512 | <i>lacZ lacI lambda::P1<sub>-61+1</sub> rrmB lacZ rpoC</i> <sup>P451L</sup> <i>thiC::Tn10</i>        | JJC4112 * P1 JJC4162             |
| JJC4514 | <i>lacZ lacI lambda::P1<sub>-61+1</sub> rrmB lacZ rpoB</i> <sup>H447R</sup> <i>thiC::Tn10</i>        | JJC4112 * P1 JJC4163             |
| JJC4515 | <i>lacZ lacI lambda::P1<sub>-61+1</sub> rrmB lacZ rpoC</i> <sup>N518D</sup> <i>thiC::Tn10</i>        | JJC4112 * P1 JJC4200             |
| JJC4525 | <i>lacZ lacI lambda::P1<sub>-61+1</sub> rrmB lacZ rpoC</i> <sup>H113R</sup> <i>thiC::Tn10</i>        | JJC4112 * P1 JJC4170             |
| JJC4528 | <i>rpoC</i> <sup><math>\Delta 215-220</math></sup> <i>thiC::Tn10</i>                                 | JJC40 * P1 JJC4109               |
| JJC4531 | <i>rpoC</i> <sup>H113R</sup> <i>thiC::Tn10</i>                                                       | JJC40 * P1 JJC4340               |
| JJC4532 | <i>rpoC</i> <sup>H113R</sup> <i>thiC::Tn10</i>                                                       | JJC40 * P1 JJC4170               |
| JJC4547 | <i>rpoC</i> <sup>N518D</sup> <i>thiC::Tn10</i> $\Delta ruvABC::cm$                                   | JJC4488 * P1 JJC2230             |
| JJC4548 | <i>rpoC</i> <sup>P451L</sup> <i>thiC::Tn10</i> $\Delta ruvABC::cm$                                   | JJC4488 * P1 JJC2230             |
| JJC4549 | <i>rpoB</i> <sup>D444G</sup> <i>thiC::Tn10</i> $\Delta ruvABC::cm$                                   | JJC4490 * P1 JJC2230             |
| JJC4553 | <i>rpoC</i> <sup>N518D</sup> <i>thiC::Tn10</i> <i>relA::kan</i>                                      | JJC4488 * P1 JJC4107             |
| JJC4554 | <i>rpoC</i> <sup>P451L</sup> <i>thiC::Tn10</i> <i>relA::kan</i>                                      | JJC4489 * P1 JJC4107             |
| JJC4555 | <i>rpoB</i> <sup>D444G</sup> <i>thiC::Tn10</i> <i>relA::kan</i>                                      | JJC4490 * P1 JJC4107             |
| JJC4556 | <i>rpoB</i> <sup>H447R</sup> <i>thiC::Tn10</i> <i>relA::kan</i>                                      | JJC4491 * P1 JJC4107             |
| JJC4557 | <i>rpoC</i> <sup>H113R</sup> <i>thiC::Tn10</i> <i>relA::kan</i>                                      | JJC4531 * P1 JJC4107             |
| JJC4558 | <i>rpoC</i> <sup>H113R</sup> <i>thiC::Tn10</i> <i>relA::kan</i>                                      | JJC4532 * P1 JJC4107             |
| JJC4719 | <i>rep::cam uvrD::Tn5 rpoC</i> <sup><math>\Delta 215-220</math></sup> <i>thiC::Tn10</i> [pGBts-rep+] | JJC1708 * P1 JJC4528             |
| JJC4818 | <i>rpoB</i> <sup>N518D</sup> <i>thiC::Tn10 greB::kan greA::cam</i>                                   | [JJC4488 *P14205] * P1 4204      |
| JJC4820 | <i>rpoB</i> <sup>D444G</sup> <i>thiC::Tn10 greB::kan greA::cam</i>                                   | [JJC4490 *P14205] * P1 4204      |
| JJC4821 | <i>rpoB</i> <sup>H447R</sup> <i>thiC::Tn10 greB::kan greA::cam</i>                                   | [JJC4491 *P14205] * P1 4204      |
| JJC4822 | <i>rpoC</i> <sup>H113R</sup> <i>thiC::Tn10 greB::kan greA::cam</i>                                   | [JJC4531 * P14205] * P1 4204     |
| JJC4823 | <i>rpoC</i> <sup>H113R</sup> <i>thiC::Tn10 greB::kan greA::cam</i>                                   | [JJC4532 *P14205] * P1 4204      |
| JJC4824 | <i>greB::kan greA::cam</i>                                                                           | [JJC40 *P14205] * P1 4204        |
| JJC4828 | InvA $\Delta dinG \Delta rep::cm^R$ [pAM-rep]                                                        | (Boubakri <i>et al.</i> , 2010)  |
| JJC4832 | <i>rpoB</i> <sup>H447R</sup> <i>thiC::Tn10</i> $\Delta ruvABC::cm$                                   | JJC4491 * P1 JJC2230             |
| JJC4860 | <i>rpoB</i> <sup>N518D</sup> <i>thiC::Tn10</i> $\Delta recQ::cam$                                    | JJC4488 *P1 JJC4174              |
| JJC4861 | <i>rpoC</i> <sup>P451L</sup> <i>thiC::Tn10</i> $\Delta recQ::cam$                                    | JJC4489 *P1 JJC4174              |
| JJC4862 | <i>rpoB</i> <sup>D444G</sup> <i>thiC::Tn10</i> $\Delta recQ::cam$                                    | JJC4490 *P1 JJC4174              |
| JJC4863 | <i>rpoB</i> <sup>H447R</sup> <i>thiC::Tn10</i> $\Delta recQ::cam$                                    | JJC4491 *P1 JJC4174              |
| JJC4864 | <i>rpoC</i> <sup><math>\Delta 215-220</math></sup> <i>thiC::Tn10</i> $\Delta recQ::cam$              | JJC4528 *P1 JJC4174              |
| JJC4865 | <i>rpoC</i> <sup>H113R</sup> <i>thiC::Tn10</i> $\Delta recQ::cam$                                    | JJC4532 *P1 JJC4174              |
| JJC4986 | <i>rpoC</i> <sup><math>\Delta 215-220</math></sup> <i>thiC::Tn10</i> $\Delta ruvABC::cm$             | JJC4528 * P1 JJC2230             |
| JJC4895 | <i>rpoB</i> <sup>N518D</sup> <i>thiC::Tn10 rep::Ap uvrD::Tn5</i> [pGBts-rep+]                        | JJC4488 [pGBts-rep]* P1 JJC2418  |
| JJC4896 | <i>rpoB</i> <sup>D444G</sup> <i>thiC::Tn10 rep::Ap uvrD::Tn5</i> [pGBts-rep+]                        | JJC4490 [pGBts-rep]* P1 JJC2418  |
| JJC4897 | <i>rpoC</i> <sup><math>\Delta 215-220</math></sup> <i>thiC::Tn10 rep::Ap uvrD::Tn5</i> [pGBts-rep+]  | JJC4528 [pGBts-rep]* P1 JJC2418  |
| JJC4898 | <i>rpoC</i> <sup>H113R</sup> <i>thiC::Tn10 rep::Ap uvrD::Tn5</i> [pGBts-rep+]                        | JJC4532 [pGBts-rep]* P1 JJC2418  |
| JJC4899 | <i>rpoC</i> <sup>P451L</sup> <i>thiC::Tn10 rep::Ap uvrD::Tn5</i> [pGBts-rep+]                        | JJC4489 [pGBts-rep]* P1 JJC2418  |
| JJC4900 | <i>rpoB</i> <sup>H447R</sup> <i>thiC::Tn10 rep::Ap uvrD::Tn5</i> [pGBts-rep+]                        | JJC4491 [pGBts-rep]* P1 JJC2418  |
| JJC4901 | <i>rpoB</i> <sup>N518D</sup> <i>thiC::Tn10</i> $\Delta recQ::cam rep::Ap uvrD::Tn5$ [pGBts-rep+]     | JJC4860 [pGBts-rep] * P1 JJC2418 |

|         |                                                                                                                                                                                                                              |                                  |
|---------|------------------------------------------------------------------------------------------------------------------------------------------------------------------------------------------------------------------------------|----------------------------------|
| JJC4902 | <i>rpoC</i> <sup>P451L</sup> <i>thiC</i> ::Tn10 $\Delta$ <i>recQ</i> :: <i>cam rep</i> :: <i>Ap uvrD</i> ::Tn5 [pGBts-rep+]                                                                                                  | JJC4861 [pGBts-rep] * P1 JJC2418 |
| JJC4903 | <i>rpoB</i> <sup>D444G</sup> <i>thiC</i> ::Tn10 $\Delta$ <i>recQ</i> :: <i>cam rep</i> :: <i>Ap uvrD</i> ::Tn5 [pGBts-rep+]                                                                                                  | JJC4862 [pGBts-rep] * P1 JJC2418 |
| JJC4904 | <i>rpoB</i> <sup>H447R</sup> <i>thiC</i> ::Tn10 $\Delta$ <i>recQ</i> :: <i>cam rep</i> :: <i>Ap uvrD</i> ::Tn5 [pGBts-rep+]                                                                                                  | JJC4863 [pGBts-rep] * P1 JJC2418 |
| JJC4905 | <i>rpoC</i> <sup><math>\Delta</math>215-220</sup> <i>thiC</i> ::Tn10 $\Delta$ <i>recQ</i> :: <i>cam rep</i> :: <i>Ap uvrD</i> ::Tn5 [pGBts-rep+]                                                                             | JJC4864 [pGBts-rep] * P1 JJC2418 |
| JJC4906 | <i>rpoC</i> <sup>H113R</sup> <i>thiC</i> ::Tn10 $\Delta$ <i>recQ</i> :: <i>cam rep</i> :: <i>Ap uvrD</i> ::Tn5 [pGBts-rep+]                                                                                                  | JJC4865 [pGBts-rep] * P1 JJC2418 |
| JJC4911 | <i>rpoB</i> <sup>D444G</sup> <i>thiC</i> ::Tn10 <i>rep</i> :: <i>Ap uvrD</i> ::Tn5 [pGBts-rep+] $\Delta$ <i>dinG</i> :: <i>cm</i>                                                                                            | JJC4896 * P1 JJC1861             |
| JJC4912 | <i>rpoC</i> <sup><math>\Delta</math>215-220</sup> <i>thiC</i> ::Tn10 <i>rep</i> :: <i>Ap uvrD</i> ::Tn5 [pGBts-rep+] $\Delta$ <i>dinG</i> :: <i>cm</i>                                                                       | JJC4897 * P1 JJC1861             |
| JJC4913 | <i>rpoC</i> <sup>H113R</sup> <i>thiC</i> ::Tn10 <i>rep</i> :: <i>Ap uvrD</i> ::Tn5 [pGBts-rep+] $\Delta$ <i>dinG</i> :: <i>cm</i>                                                                                            | JJC4898 * P1 JJC1861             |
| JJC4918 | <i>rpoB</i> <sup>H447R</sup> <i>thiC</i> ::Tn10 <i>rep</i> :: <i>Ap uvrD</i> ::Tn5 [pGBts-rep+] $\Delta$ <i>dinG</i> :: <i>cm</i>                                                                                            | JJC4900 * P1 JJC1861             |
| JJC4940 | <i>InvA</i> $\Delta$ <i>dinG</i>                                                                                                                                                                                             | (Boubakri <i>et al.</i> , 2010)  |
| JJC4962 | <i>InvA</i> $\Delta$ <i>dinG</i> <i>rpoC</i> <sup><math>\Delta</math>215-220</sup> <i>thiC</i> ::Tn10                                                                                                                        | (Boubakri <i>et al.</i> , 2010)  |
| JJC5136 | $\Delta$ <i>rep</i> ::kan <sup>R</sup> $\Delta$ <i>uvrD294</i> ::kan <sup>R</sup> <i>recF400</i> ::Tn5 [pAM-rep]                                                                                                             | (Boubakri <i>et al.</i> , 2010)  |
| JJC5151 | $\Delta$ <i>rep</i> ::kan <sup>R</sup> $\Delta$ <i>uvrD294</i> ::kan <sup>R</sup> <i>recF400</i> ::Tn5 $\Delta$ <i>dinG</i> ::Cm <sup>R</sup> [pAM-rep]                                                                      | (Boubakri <i>et al.</i> , 2010)  |
| JJC5152 | $\Delta$ <i>rep</i> ::kan <sup>R</sup> $\Delta$ <i>uvrD294</i> ::kan <sup>R</sup> <i>recF400</i> ::Tn5 <i>rpoC</i> <sup><math>\Delta</math>215-220</sup> <i>thiC</i> ::Tn10 [pAM-rep]                                        | (Boubakri <i>et al.</i> , 2010)  |
| JJC5153 | $\Delta$ <i>rep</i> ::kan <sup>R</sup> $\Delta$ <i>uvrD294</i> ::kan <sup>R</sup> <i>recF400</i> ::Tn5 <i>rpoC</i> <sup><math>\Delta</math>215-220</sup> <i>thiC</i> ::Tn10                                                  | (Boubakri <i>et al.</i> , 2010)  |
| JJC5166 | $\Delta$ <i>rep</i> ::kan <sup>R</sup> $\Delta$ <i>uvrD294</i> ::kan <sup>R</sup> <i>recF</i> ::Tn5 <i>zid</i> ::Tn10 [pAM-rep]                                                                                              | (Boubakri <i>et al.</i> , 2010)  |
| JJC5169 | $\Delta$ <i>rep</i> ::kan <sup>R</sup> $\Delta$ <i>uvrD294</i> ::kan <sup>R</sup> <i>recF400</i> ::Tn5 $\Delta$ <i>dinG</i> ::Cm <sup>R</sup> <i>rpoC</i> <sup><math>\Delta</math>215-220</sup> <i>thiC</i> ::Tn10 [pAM-rep] | (Boubakri <i>et al.</i> , 2010)  |
| JJC5170 | $\Delta$ <i>rep</i> ::kan <sup>R</sup> $\Delta$ <i>uvrD294</i> ::kan <sup>R</sup> <i>recF400</i> ::Tn5 <i>rpoC</i> <sup><math>\Delta</math>215-220</sup> <i>thiC</i> ::Tn10 $\Delta$ <i>dinG</i> ::Cm <sup>R</sup> [pAM-rep] | (Boubakri <i>et al.</i> , 2010)  |
| JJC5236 | <i>InvA</i> $\Delta$ <i>dinG</i> <i>rpoB</i> <sup>H447R</sup> <i>thiC</i> ::Tn10                                                                                                                                             | JJC4940 * P1 JJC4163             |
| JJC5237 | <i>InvA</i> $\Delta$ <i>dinG</i> <i>rpoC</i> <sup>H113R</sup> <i>thiC</i> ::Tn10                                                                                                                                             | JJC4940 * P1 JJC4170             |
| JJC5238 | <i>InvA</i> $\Delta$ <i>dinG</i> <i>rpoC</i> <sup>H113R</sup> <i>thiC</i> ::Tn10                                                                                                                                             | JJC4940 * P1 JJC4340             |
| JJC5239 | <i>InvA</i> $\Delta$ <i>dinG</i> <i>rpoB</i> <sup>D444G</sup> <i>thiC</i> ::Tn10                                                                                                                                             | JJC4940 * P1 JJC4164             |
| JJC5241 | <i>InvA</i> $\Delta$ <i>dinG</i> <i>rpoB</i> <sup>N518D</sup> <i>thiC</i> ::Tn10                                                                                                                                             | JJC4940 * P1 JJC4200             |
| JJC5253 | <i>rep</i> :: <i>Ap</i> $\Delta$ ( <i>uvrD-yigB</i> ):: <i>cam zid</i> ::Tn10 $\Delta$ <i>dinG</i> :: <i>kan rpoC</i> <sup>P451L</sup> [pAM-rep]                                                                             | JJC4247 * P1 JJC1857             |
| JJC5254 | <i>rep</i> :: <i>Ap</i> $\Delta$ ( <i>uvrD-yigB</i> ):: <i>cam zid</i> ::Tn10 $\Delta$ <i>dinG</i> :: <i>kan rpoB</i> <sup>H447R</sup> [pAM-rep]                                                                             | JJC4248 * P1 JJC1857             |
| JJC5255 | <i>rep</i> :: <i>Ap</i> $\Delta$ ( <i>uvrD-yigB</i> ):: <i>cam zid</i> ::Tn10 $\Delta$ <i>dinG</i> :: <i>kan rpoB</i> <sup>D444G</sup> [pAM-rep]                                                                             | JJC4249 * P1 JJC1857             |
| JJC5257 | <i>rep</i> :: <i>Ap</i> $\Delta$ ( <i>uvrD-yigB</i> ):: <i>cam zid</i> ::Tn10 $\Delta$ <i>dinG</i> :: <i>kan rpoC</i> <sup>H113R</sup> [pAM-rep]                                                                             | JJC4251 * P1 JJC1857             |
| JJC5258 | Hfr PK3-PO131 <i>zid</i> ::Tn10 <i>rep</i> :: <i>Ap</i> $\Delta$ ( <i>uvrD-yigB</i> ):: <i>cam rpoB</i> <sup>N518D</sup>                                                                                                     | JJC4253 * P1 JJC1857             |
| JJC5259 | <i>rep</i> :: <i>Ap uvrD</i> ::Tn5 <i>recF400</i> ::Tn5 [pGBts-rep+] [pEM001]                                                                                                                                                | JJC2451 transformed with pEM001  |
| JJC5261 | <i>sfiA11 rep</i> :: <i>Ap</i> $\Delta$ ( <i>uvrD-yigB</i> ):: <i>cam recO</i> ::Tn5 <i>rpoC</i> <sup><math>\Delta</math>215-220</sup> <i>thiC</i> ::Tn10 [pGBts-rep+]                                                       | JJC2488 * P JJC4528              |
| JJC5267 | <i>InvA</i> $\Delta$ <i>dinG</i> $\Delta$ <i>rep</i> ::cm <sup>R</sup> <i>rpoB</i> <sup>H447R</sup> <i>thiC</i> ::Tn10 [pAM-rep]                                                                                             | JJC4828 * P1 JJC4163             |
| JJC5268 | <i>InvA</i> $\Delta$ <i>dinG</i> $\Delta$ <i>rep</i> ::cm <sup>R</sup> <i>rpoC</i> <sup>H113R</sup> <i>thiC</i> ::Tn10 [pAM-rep]                                                                                             | JJC4828 * P1 JJC4340             |
| JJC5269 | <i>InvA</i> $\Delta$ <i>dinG</i> $\Delta$ <i>rep</i> ::cm <sup>R</sup> <i>rpoB</i> <sup>N518D</sup> <i>thiC</i> ::Tn10 [pAM-rep]                                                                                             | JJC4828 * P1 JJC4200             |
| JJC5308 | <i>InvA</i> $\Delta$ <i>dinG</i> $\Delta$ <i>rep</i> ::cm <sup>R</sup> <i>rpoB</i> <sup>D444G</sup> <i>thiC</i> ::Tn10 [pAM-rep]                                                                                             | JJC4828 * P1 JJC4164             |
| JJC5309 | <i>rpoB</i> <sup>N518D</sup> <i>thiC</i> ::Tn10 <i>rep</i> :: <i>Ap uvrD</i> ::Tn5 [pGBts-rep+] $\Delta$ <i>recQ</i> :: <i>cam</i>                                                                                           | JJC4895 * P1 JJC4174             |
| JJC5310 | <i>rpoB</i> <sup>N518D</sup> <i>thiC</i> ::Tn10 <i>rep</i> :: <i>Ap uvrD</i> ::Tn5 [pGBts-rep+] $\Delta$ <i>dinG</i> :: <i>cm</i>                                                                                            | JJC4895 * P1 JJC1861             |
| JJC5312 | <i>rpoC</i> <sup>P451L</sup> <i>thiC</i> ::Tn10 <i>rep</i> :: <i>Ap uvrD</i> ::Tn5 [pGBts-rep+] $\Delta$ <i>dinG</i> :: <i>cm</i>                                                                                            | JJC4899 * P1 JJC1861             |
| JJC5313 | <i>rpoC</i> <sup>P451L</sup> <i>thiC</i> ::Tn10 <i>rep</i> :: <i>Ap uvrD</i> ::Tn5 [pGBts-rep+] $\Delta$ <i>recQ</i> :: <i>cam</i>                                                                                           | JJC4899 * P1 JJC4174             |
| JJC5344 | <i>InvA</i> $\Delta$ <i>dinG</i> $\Delta$ <i>rep</i> ::cm <sup>R</sup> <i>rpoC</i> <sup>P451L</sup> <i>thiC</i> ::Tn10 [pAM-rep]                                                                                             | JJC4828 * P1 JJC4162             |

|         |                                                                                                                              |                                           |
|---------|------------------------------------------------------------------------------------------------------------------------------|-------------------------------------------|
| JJC5351 | <i>rep::Ap Δ(uvrD-yigB)::cam zid::Tn10 rpoC<sup>H113R</sup> [pAM-rep]</i>                                                    | JJC4141 * P1 CAG18999                     |
| JJC5400 | <i>InvA ΔdinG rpoC<sup>P451L</sup> thiC::Tn10</i>                                                                            | JJC4940 * P1 JJC4162                      |
| JJC5405 | <i>Δrep ::kanR ΔuvrD294 ::kan<sup>R</sup> recF400 ::Tn5 ΔdinG ::Cm<sup>R</sup> rpoB<sup>N518D</sup> thiC::Tn10 [pAM-rep]</i> | JJC5151 * P1 JJC4200                      |
| JJC5406 | <i>Δrep ::kanR ΔuvrD294 ::kan<sup>R</sup> recF400 ::Tn5 ΔdinG ::Cm<sup>R</sup> rpoC<sup>P451L</sup> thiC::Tn10 [pAM-rep]</i> | JJC5151 * P1 JJC4162                      |
| JJC5407 | <i>Δrep ::kanR ΔuvrD294 ::kan<sup>R</sup> recF400 ::Tn5 ΔdinG ::Cm<sup>R</sup> rpoC<sup>H113R</sup> thiC::Tn10 [pAM-rep]</i> | JJC5151 * P1 JJC4340                      |
| JJC5425 | <i>Δrep ::kanR ΔuvrD294 ::kan<sup>R</sup> recF400 ::Tn5 ΔdinG ::Cm<sup>R</sup> rpoB<sup>D444G</sup> thiC::Tn10 [pAM-rep]</i> | JJC5151 * P1 JJC4164                      |
| JJC5426 | <i>Δrep ::kanR ΔuvrD294 ::kan<sup>R</sup> recF400 ::Tn5 ΔdinG ::Cm<sup>R</sup> rpoB<sup>H447R</sup> thiC::Tn10 [pAM-rep]</i> | JJC5151 * P1 JJC4163                      |
| JJC5449 | <i>greB::kan</i>                                                                                                             | JJC40 *P14205                             |
| JJC5450 | <i>rpoC<sup>P451L</sup> thiC::Tn10 greB::kan</i>                                                                             | JJC4489 *P14205                           |
| JJC5455 | <i>greB::kan greA::cam</i>                                                                                                   | JJC5449* P1 4204                          |
| JJC5456 | <i>rpoC<sup>P451L</sup> thiC::Tn10 greB::kan greA::cam</i>                                                                   | JJC5450 * P1 4204                         |
| JJC5469 | <i>lacZ lacI lambda::P1<sub>-61+1</sub> rnhB lacZ rpoB<sup>D444G</sup> thiC::Tn10</i>                                        | JJC4112 * P1 JJC4164                      |
| JJC5523 | <i>rpoC<sup>N518D</sup> thiC::Tn10 relA::kan spoT::kan</i>                                                                   | JJC4553 * P1 JJC4108                      |
| JJC5524 | <i>rpoC<sup>P451L</sup> thiC::Tn10 relA::kan spoT::kan</i>                                                                   | JJC4554 * P1 JJC4108                      |
| JJC5525 | <i>rpoB<sup>D444G</sup> thiC::Tn10 relA::kan spoT::kan</i>                                                                   | JJC4555 * P1 JJC4108                      |
| JJC5526 | <i>rpoB<sup>H447R</sup> thiC::Tn10 relA::kan spoT::kan</i>                                                                   | JJC4556 * P1 JJC4108                      |
| JJC5527 | <i>rpoC<sup>H113R</sup> thiC::Tn10 relA::kan spoT::kan</i>                                                                   | JJC4557 * P1 JJC4108                      |
| JJC5528 | <i>rpoC<sup>H113R</sup> thiC::Tn10 relA::kan spoT::kan</i>                                                                   | JJC4558* P1 JJC4108                       |
| JJC5532 | <i>rpoB<sup>N518D</sup> thiC::Tn10 [pAM-rep] ΔrecB::kan</i>                                                                  | JJC4488 [pAM-rep] * P1 JJC1086            |
| JJC5533 | <i>rpoC<sup>P451L</sup> thiC::Tn10 [pAM-rep] ΔrecB::kan</i>                                                                  | JJC4489 [pAM-rep] * P1 JJC1086            |
| JJC5534 | <i>rpoC<sup>H113R</sup> thiC::Tn10 [pAM-rep] ΔrecB::kan</i>                                                                  | JJC4532 [pAM-rep] * P1 JJC1086            |
| JJC5535 | <i>rpoB<sup>D444G</sup> thiC::Tn10 [pAM-rep] ΔrecB::kan</i>                                                                  | JJC4490 [pAM-rep] * P1 JJC1086            |
| JJC5536 | <i>rpoB<sup>H447R</sup> thiC::Tn10 [pAM-rep] ΔrecB::kan</i>                                                                  | JJC4491 [pAM-rep] * P1 JJC1086            |
| JJC5540 | <i>rpoC<sup>Δ215-220</sup> thiC::Tn10 priA2::kan [pAM-priA]</i>                                                              | MG1655 priA2::kan [pAM-priA] * P1 JJC4528 |
| JJC5541 | <i>rpoC<sup>H113R</sup> thiC::Tn10 priA2::kan [pAM-priA]</i>                                                                 | MG1655 priA2::kan [pAM-priA] * P1 JJC4170 |

## Plasmids

| Name      | Description                                                                                                      | Reference                        |
|-----------|------------------------------------------------------------------------------------------------------------------|----------------------------------|
| pGBts-rep | pGB2ts vector carrying the <i>rep</i> gene under the control of its own promoter                                 | (Petit and Ehrlich, 2002)        |
| pAM-rep   | pAM34 vector carrying the <i>rep</i> gene under the control of its own promoter                                  | (Lestini and Michel, 2008)       |
| pAM-priA  | pAM34 vector carrying the <i>priA</i> gene under the control of its own promoter                                 | (Grompone <i>et al.</i> , 2004)  |
| pEM001    | pACYC184 vector carrying the <i>rnh</i> (RnaseH) gene under the control of its own promoter                      | (Masse <i>et al.</i> , 1997)     |
| pRL385    | pUC vector carrying the <i>rpoB</i> wild-type gene under the control of Pr- <i>lac</i> (IPTG inducible) promoter | (Bartlett <i>et al.</i> , 1998)) |

Table S2 Complementation of the *rpo*<sup>sup</sup> mutations with a pUC-RpoB<sup>+</sup> plasmid

|                                   | MM 37°C p-RpoB+                           |                                           | LB 25°C pRpoB+                            |                                           |
|-----------------------------------|-------------------------------------------|-------------------------------------------|-------------------------------------------|-------------------------------------------|
|                                   | -IPTG                                     | +IPTG                                     | -IPTG                                     | +IPTG                                     |
| S3m- <i>rpoB</i> <sup>H447R</sup> | 1.9 10 <sup>9</sup> ± 1.5 10 <sup>8</sup> | 1.6 10 <sup>9</sup> ± 2.8 10 <sup>8</sup> | 1.8 10 <sup>9</sup> ± 2.5 10 <sup>8</sup> | <1 10 <sup>7</sup>                        |
| S3a- <i>rpoB</i> <sup>D444G</sup> | 9 10 <sup>7</sup> ± 4.2 10 <sup>7</sup>   | 2.5 10 <sup>8</sup> ± 6.3 10 <sup>7</sup> | 4.4 10 <sup>8</sup> ± 3 10 <sup>8</sup>   | 2 10 <sup>8</sup> ± 1.3 10 <sup>8</sup>   |
| S1- <i>rpoC</i> <sup>P541L</sup>  | 7.5 10 <sup>8</sup> ± 5.3 10 <sup>7</sup> | 1.5 10 <sup>9</sup> ± 7.6 10 <sup>8</sup> | 1.4 10 <sup>8</sup> ± 8.7 10 <sup>7</sup> | 1.1 10 <sup>9</sup> ± 1.5 10 <sup>8</sup> |
| S3b- <i>rpoC</i> <sup>H113R</sup> | 2.1 10 <sup>9</sup> ± 4.2 10 <sup>8</sup> | 1.9 10 <sup>9</sup> ± 3.5 10 <sup>8</sup> | 9.5 10 <sup>8</sup> ± 3.5 10 <sup>8</sup> | 1.7 10 <sup>9</sup> ± 2.9 10 <sup>8</sup> |

The plasmid pRL385 (a pUC derived plasmid that carries the *rpoB* wild-type gene under the control of Pr-lac (IPTG inducible) {Bartlett, 1998 #11951}), was introduced by transformation in the four *rep uvrD recF rpo*<sup>mut</sup> strains, selecting on MM ampicillin (Ap) at 37°C. Transformants were grown ON in MM Ap at 37°C and plated on MM Ap or LB Ap plates, containing (+IPTG) or not (– IPTG) IPTG. MM plates were incubated at 37°C and LB plates at 25°C. The number of colony forming units (cfu) is indicated here. Since the *rep uvrD recF Rpo*<sup>+</sup> cells are cryo-sensitive on LB at 25°C, complementation of an *rpoB* mutation by the wild-type *rpoB* allele is expected to confer cryo-sensitivity.

Table S3 Out of the 5 different *rpo*<sup>sup</sup> mutations, only *rpoB*<sup>H447R</sup> suppresses the auxotrophy of a *relA spoT* mutant.

| Strain  | genotype                          | $\Delta spoT::Cm^R$ transductants |                   | Name of the <i>rpoB</i> <sup>sup</sup> <i>relA spoT</i> mutant <sup>(b)</sup> and growth on MM <sup>(a)</sup> |
|---------|-----------------------------------|-----------------------------------|-------------------|---------------------------------------------------------------------------------------------------------------|
|         |                                   | LB                                | MM <sup>(a)</sup> |                                                                                                               |
| JJC4553 | $\Delta relA::Kan^R rpoB^{N518D}$ | 146                               | 0                 | JJC5523 -                                                                                                     |
| JJC4554 | $\Delta relA::Kan^R rpoC^{P541L}$ | 148                               | 0                 | JJC5524 -                                                                                                     |
| JJC4555 | $\Delta relA::Kan^R rpoB^{D444G}$ | 230                               | 0                 | JJC5525 -                                                                                                     |
| JJC4556 | $\Delta relA::Kan^R rpoB^{H447R}$ | 166                               | 160               | JJC5526 +                                                                                                     |
| JJC4557 | $\Delta relA::Kan^R rpoC^{H113R}$ | 172                               | 0                 | JJC5527 -                                                                                                     |
| JJC4558 | $\Delta relA::Kan^R rpoC^{H113R}$ | 100                               | 0                 | JJC5528 -                                                                                                     |
| JJC4559 | $\Delta relA::Kan^R Rpo+$         | 60                                | 0                 | JJC5529 -                                                                                                     |

(a) Because the experiment is done in a JJC40 background, which requires histidine, leucine and arginine for growth, these three amino acids were included in the MM glucose plates.

(b) The *rpoB*<sup>sup</sup> *relA spoT* mutants were propagated on LB and tested on MM glucose supplemented with histidine, leucine and arginine; they are also described in Table S1.

Table S4 Oligonucleotides used for checking mutations and sequencing.

| Purpose (name)                            | Sequence (5' to 3')                                            |
|-------------------------------------------|----------------------------------------------------------------|
| delta-dinG::kan                           | TCTCTTATTTGATTCCCGGCATCGCCATTGCCCGCGAAGAGTGTGTAGGCTGGAGCTGCTTC |
| delta-dinG::kan                           | AACAAGTCCAGCTGTAGCCGATACCACGGCGCGGTGATTTTCATATGAATATCCTCCTTA   |
| To check dinG (dinG1)                     | ATGTTGGTGGTTATTGCGAGCC                                         |
| To check dinG (dinGa)                     | GCGCAGTATCCCGGTCTAAATC                                         |
| To check rep (ext1)                       | CTTACACGCGGTCACATTC                                            |
| To check rep (int4)                       | CGGCCTTGATTATTTCCC                                             |
| To check rpoC <sup>Δ215-220</sup> (ext1)  | CTGGAAGACGAGTAATTCTCT                                          |
| To check rpoC <sup>Δ215-220</sup> (rpoCi) | GTTTGATACGCTTGGTCAGC                                           |
| To check recF (recF1)                     | CGTGTCGCCGATATACA                                              |
| To check recF (recFa)                     | GACGTTACCTATAGCGG                                              |
| To check priA (priA1)                     | ATCCGCACTCTTCTACGG                                             |
| To check priA (priAa)                     | GCGTGAAAACGGTTACAG                                             |

## References

- Bartlett, M.S., Gaal, T., Ross, W., and Gourse, R.L. (1998) RNA polymerase mutants that destabilize RNA polymerase-promoter complexes alter NTP-sensing by *rrn* P1 promoters. *J Mol Biol* **279**: 331-345.
- Boubakri, H., de Septenville, A.L., Viguera, E., and Michel, B. (2010) The helicases DinG, Rep and UvrD cooperate to promote replication across transcription units in vivo. *Embo J* **29**: 145-157.
- Datsenko, K.A., and Wanner, B.L. (2000) One-step inactivation of chromosomal genes in *Escherichia coli* K-12 using PCR products. *Proc Natl Acad Sci U S A* **97**: 6640-6645.
- Flores, M.J., Sanchez, N., and Michel, B. (2005) A fork-clearing role for UvrD. *Mol. Microbiol.* **57**: 1664-1675.
- Grompone, G., Bidnenko, V., Ehrlich, S.D., and Michel, B. (2004) PriA is essential for viability of the *Escherichia coli* topoisomerase IV *parE10(Ts)* mutant. *J Bacteriol* **186**: 1197-1199.
- Lestini, R., and Michel, B. (2007) UvrD controls the access of recombination proteins to blocked replication forks. *Embo J* **26**: 3804-3814.
- Lestini, R., and Michel, B. (2008) UvrD and UvrD252 counteract RecQ, RecJ, and RecFOR in a rep mutant of *Escherichia coli*. *J Bacteriol* **190**: 5995-6001.
- Masse, E., Phoenix, P., and Drolet, M. (1997) DNA topoisomerases regulate R-loop formation during transcription of the *rrnB* operon in *Escherichia coli*. *J Biol Chem* **272**: 12816-12823.
- Murphy, K.C. (1998) Use of bacteriophage lambda recombination functions to promote gene replacement in *Escherichia coli*. *Journal of Bacteriology* **180**: 2063-2071.
- Nichols, B.P., Shafiq, O., and Meiners, V. (1998) Sequence analysis of Tn10 insertion sites in a collection of *Escherichia coli* strains used for genetic mapping and strain construction. *J Bacteriol* **180**: 6408-6411.
- Petit, M.A., and Ehrlich, D. (2002) Essential bacterial helicases that counteract the toxicity of recombination proteins. *Embo J* **21**: 3137-3147.
- Seigneur, M., Bidnenko, V., Ehrlich, S.D., and Michel, B. (1998) RuvAB acts at arrested replication forks. *Cell* **95**: 419-430.
- Uzest, M., Ehrlich, S.D., and Michel, B. (1991) The *Escherichia coli* *terB* sequence affects maintenance of a plasmid with the M13 phage replication origin. *J Bacteriol* **173**: 7695-7697.
